# Supplementary material for: Genome-Wide Association Study of Golden Retrievers Identifies Germ-Line Risk Factors Predisposing to Mast Cell Tumours
Source: PLOS journal article supplement (doi:10.1371/journal.pgen.1005647), 2015-11-20

## Supp. Figure 8

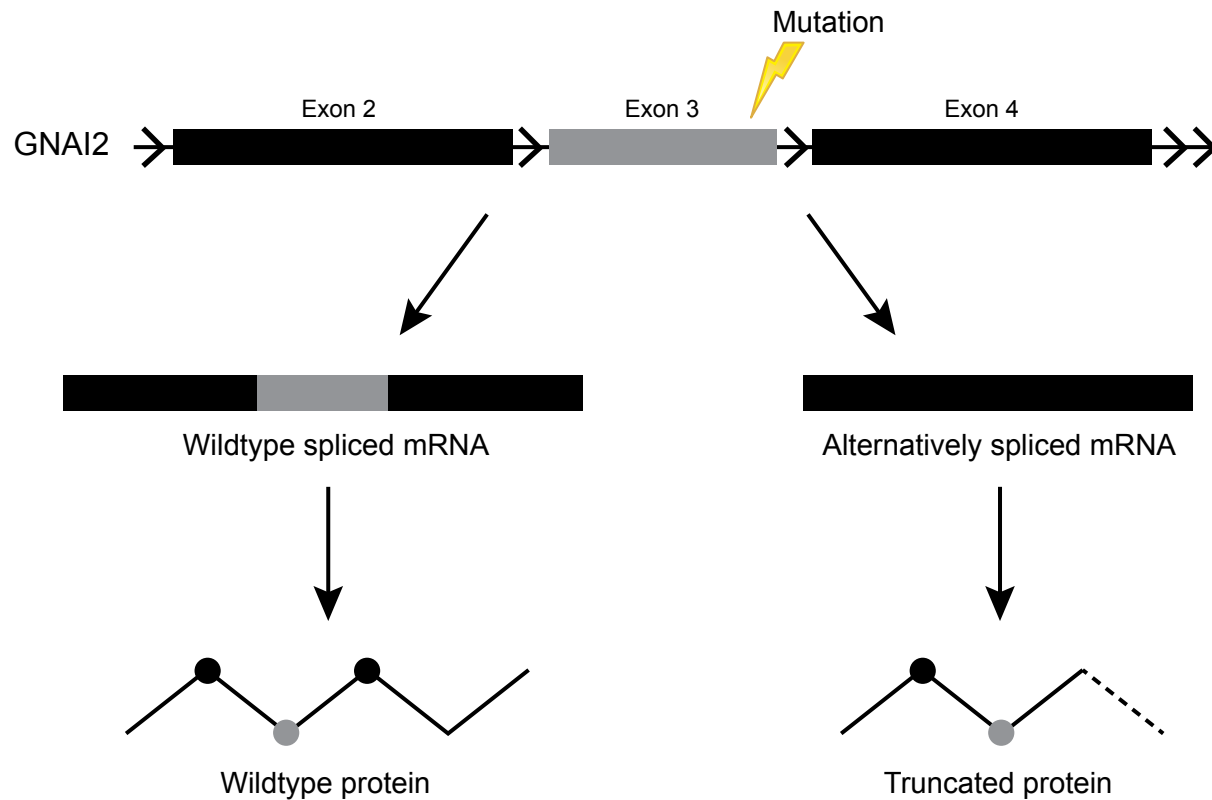

Supplement: S8 (10.1371/journal.pgen.1005647.s008) [file journal.pgen.1005647.s008]
